# Supplementary material
Source: Research Square preprint supplement (doi:10.21203/rs.3.rs-9152762/v1)
Supplement: Supplementary file 1 [file 914444242cf372921fb0e020.docx]

# **Appendix A — Formal Model Specifications**

The following equations define the five models estimated. Notation: female = 1 for female, 0 for male; d_title = dummy vector for academic title (reference: other/unlisted); d_title_coll = collapsed four-level version used in Model 1a; d_disc = dummy vector for disciplinary category (reference: Social Sciences); d_tier = dummy vector for institutionalisation tier (reference: emerging). All binary and ordinal outcomes modelled via logistic link.

**Model 1a — Executive role (Firth penalised logistic)**

logit[P(y_EIC = 1)] = α + β₁·female + β₂·d_title_coll + β₃·orcid + β₄·d_tier + β₅·d_disc + β₆·(female × d_disc)

**Models 1b and 1d — Operational / Broad gatekeeping (logistic, cluster-robust SE)**

logit[P(y = 1)] = α + β₁·female + β₂·d_title + β₃·orcid + β₄·d_tier + β₅·d_disc + β₆·(female × d_disc)

**Model 1c — Support role (logistic, cluster-robust SE)**

logit[P(y_supp = 1)] = α + β₁·female + β₂·d_title + β₃·orcid + β₄·d_tier + β₅·d_disc + β₆·(female × d_title)

**Model 2 — Ordered role hierarchy (proportional odds / cumulative logit)**

logit[P(Y ≤ j)] = αⱼ − (β₁·female + β₂·d_title + β₃·orcid + β₄·d_tier + β₅·d_disc), j = 1, 2, 3

Outcome coding: support = 1 < symbolic = 2 < operational = 3 < executive = 4. Three threshold parameters α₁, α₂, α₃ separate adjacent categories. The proportionality assumption was assessed by a likelihood ratio test comparing the constrained model against a fully unconstrained (non-parallel) alternative estimated via VGAM::vglm.
