# Supplementary material
Source: Research Square preprint supplement (doi:10.21203/rs.3.rs-9152762/v1)
Supplement: Supplementary file 2 [file a03b6ff4f5276350565ecc33.docx]

# **Appendix B — Implementation Details**

All analyses were conducted in R (v4.4.x). This appendix documents key implementation decisions for replication purposes. Full annotated code is available at OSF (<https://osf.io/sxmyb/overview?view_only=527f5172d57a4004bab5b39f5caf0e0f>).

**Estimators and packages**

Model 1a was estimated using Firth's penalised maximum likelihood via logistf (v1.26.1), with brglm2 (v1.0.1) as a fallback in cases where logistf did not converge. Profile likelihood confidence intervals are reported for all Model 1a coefficients. Models 1b–1d and the outcome variable construction were estimated using standard logistic regression via glm(), with cluster-robust standard errors computed via sandwich::vcovCL (v3.1.0) using the HC1 correction and coefficient tests via lmtest::coeftest (v0.9.40). Model 2 was estimated via ordinal::clm (v2023.12.4) with a logit link; Wald confidence intervals are reported. The unconstrained proportional odds alternative was estimated via VGAM::vglm (v1.1.14).

**Average marginal effects**

AMEs were computed via marginaleffects::avg_slopes (v0.32.0) with type = "response". For Models 1b–1d, the same cluster-robust covariance matrix used in the coefficient tests was passed to avg_slopes via the vcov argument. For Model 1a, vcov = NULL was used because the logistf object does not inherit from glm, precluding the sandwich cluster correction. The Model 1a AME standard error (SE = 0.0018) is therefore not cluster-corrected and should be interpreted conservatively.

**Individual-level clustering**

The cluster identifier was constructed hierarchically: where a DergiPark person_id was available it served as the cluster unit; where absent, the individual's profile URL was used; remaining unmatched rows received a unique row-level identifier. The anonymised cluster identifier in the OSF dataset is a SHA-256 hash of the original cluster value (first 16 characters retained).

**Title collapsing (Model 1a only)**

For Model 1a, academic title was entered as a collapsed four-level factor: full professor, associate professor, assistant professor, and other_academic (combining doctorate, lecturer, research assistant, and unlisted). This collapsing was applied to mitigate quasi-complete separation risk in the rare executive outcome (~3.4% base rate). Models 1b–1d and Model 2 use the full title specification.

**Proportional odds test (Model 2)**

The proportionality assumption was assessed by comparing the constrained proportional odds model against a fully unconstrained non-parallel model fitted via VGAM::vglm with family = cumulative(parallel = FALSE). A likelihood ratio test (χ² = 4.12, df = 3, p = .249) indicated that the parallel regression assumption holds for gender; the null result in Model 2 therefore reflects genuine cancellation of opposing role-specific effects rather than an artefact of the proportionality constraint.
